# Supplementary material for: An Insight on the Biomedical Potential of Portuguese Propolis from Gerês
Source: MDPI journal article supplement (doi:10.3390/foods11213431), 2022-10-29
Supplement: s1 [file s1]

## Supplementary Material

**Supplementary Table S1** – Total phenolic content (TPC) and total flavonoid content (TFC) of the hydroalcoholic extracts of propolis from Gerês (G.EEs) and the resultant mixtures (mG). Results are expressed as mean  $\pm$  SD. (G: Gerês; mG: a mixture of propolis harvested over 5 years; EE: ethanol extract; mg GAE/g: milligram of gallic acids equivalents per gram of EE; mg QE/g: milligram of quercetin equivalents per gram of EE).

|        | Total Phenolic Content (TPC)<br>(mg GAE/g) |                    | Total Flavonoid Content (TFC)<br>(mg QE/g) |                   |
|--------|--------------------------------------------|--------------------|--------------------------------------------|-------------------|
|        | Ethanol 70% (v/v)                          | Ethanol 35% (v/v)  | Ethanol 70% (v/v)                          | Ethanol 35% (v/v) |
| G11.EE | 71.00 $\pm$ 13.31                          | 72.08 $\pm$ 12.09  | 41.86 $\pm$ 4.29                           | 30.49 $\pm$ 3.85  |
| G12.EE | 103.34 $\pm$ 18.58                         | 92.21 $\pm$ 9.90   | 46.16 $\pm$ 3.99                           | 34.11 $\pm$ 3.37  |
| G13.EE | 81.34 $\pm$ 14.48                          | 67.99 $\pm$ 6.99   | 40.73 $\pm$ 5.25                           | 33.99 $\pm$ 5.26  |
| G14.EE | 74.58 $\pm$ 11.20                          | 67.61 $\pm$ 7.68   | 44.30 $\pm$ 4.88                           | 38.43 $\pm$ 5.72  |
| G15.EE | 112.86 $\pm$ 19.24                         | 101.36 $\pm$ 10.81 | 57.55 $\pm$ 6.69                           | 34.31 $\pm$ 3.31  |
| mG.EE  | 96.13 $\pm$ 18.35                          | 89.97 $\pm$ 14.84  | 56.67 $\pm$ 4.65                           | 35.76 $\pm$ 4.71  |

**Supplementary Table S2** - DPPH• scavenging activity of hydroalcoholic extracts of propolis from Gerês. Results are expressed in EC<sub>50</sub> (µg/mL) as mean ± standard deviation (SD). (DPPH: 2,2-diphenyl-2-picryl-hydrazyl; G: Gerês; mG: a mixture of propolis samples).

| DPPH• Scavenging Activity |                          |                   |
|---------------------------|--------------------------|-------------------|
|                           | EC <sub>50</sub> (µg/mL) |                   |
|                           | Ethanol 70% (v/v)        | Ethanol 35% (v/v) |
| G11.EE                    | 9.87 ± 0.32              | 18.54 ± 0.87      |
| G12.EE                    | 4.71 ± 0.76              | 12.40 ± 0.18      |
| G13.EE                    | 16.69 ± 1.57             | 19.16 ± 0.53      |
| G14.EE                    | 7.39 ± 0.40              | 19.05 ± 1.05      |
| G15.EE                    | 5.42 ± 0.59              | 12.19 ± 1.05      |
| mG.EE                     | 4.73 ± 0.36              | 17.01 ± 0.61      |

**Supplementary Table S3** - Superoxide anion scavenging activity of hydroalcoholic extracts of propolis from Gerês. Results are expressed in EC<sub>50</sub> (µg/mL) as mean ± standard deviation (SD). (G: Gerês; mG: a mixture of propolis samples).

| Superoxide Anion Scavenging Activity |                          |                   |
|--------------------------------------|--------------------------|-------------------|
|                                      | EC <sub>50</sub> (µg/mL) |                   |
|                                      | Ethanol 70% (v/v)        | Ethanol 35% (v/v) |
| G11.EE                               | 136.00 ± 15.32           | 179.54 ± 19.61    |
| G12.EE                               | 59.71 ± 1.97             | 122.14 ± 7.16     |
| G13.EE                               | 162.11 ± 19.39           | 185.16 ± 23.86    |
| G14.EE                               | 191.87 ± 7.26            | 236.56 ± 5.45     |
| G15.EE                               | 107.66 ± 3.97            | 101.07 ± 4.82     |
| mG.EE                                | 118.11 ± 9.52            | 175.26 ± 21.56    |

**Supplementary Table S4** - Inhibition of heat-induced BSA denaturation by hydroalcoholic extracts of Gerês propolis. Results were expressed as mean  $\pm$  standard deviation (SD). (BSA: Bovine serum albumin; G: Gerês; mG: a mixture of propolis samples).

| % Inhibition of BSA Denaturation |                   |                   |
|----------------------------------|-------------------|-------------------|
|                                  | Ethanol 70% (v/v) | Ethanol 35% (v/v) |
| G11.EE                           | 61.66 $\pm$ 4.81  | 74.69 $\pm$ 5.27  |
| G12.EE                           | 24.93 $\pm$ 6.27  | 58.51 $\pm$ 2.49  |
| G13.EE                           | 53.15 $\pm$ 8.40  | 62.18 $\pm$ 3.74  |
| G14.EE                           | 52.91 $\pm$ 8.82  | 72.21 $\pm$ 5.96  |
| G15.EE                           | 60.17 $\pm$ 2.58  | 53.80 $\pm$ 7.21  |
| mG.EE                            | 65.55 $\pm$ 2.55  | 60.87 $\pm$ 2.94  |
